# Supplementary material
Source: publisher figshare collection journal article supplement (https://acs.figshare.com/ndownloader/files/28289185)
Supplement: Supplementary file 1 [file 28289185]

**Table S1.** Volunteer information

---

|                                                      |                                                                                                                                                                                                                                                    |
|------------------------------------------------------|----------------------------------------------------------------------------------------------------------------------------------------------------------------------------------------------------------------------------------------------------|
| <b>Donor information</b>                             | A 49-year-old female with BMI 29.3                                                                                                                                                                                                                 |
| <b>Health status</b>                                 | Normal blood lipid profile, normotensive, euglycemic with no chronic diseases. Had not taken any antibiotics or probiotics/prebiotics for at least 3 months.                                                                                       |
| <b>Diet requirements</b>                             | No special diet requirements (e.g., vegetarian, vegan etc.) or lifestyle.                                                                                                                                                                          |
| <b>Collection and preparation of volunteer fecal</b> | The human volunteer's first feces in the morning was immediately installed in a sample box. 1 g of the feces was added into 100 mL 0.1 M PBS buffer (pH 7.2). Then, the fecal sample was thoroughly suspended in the buffer and was given to rats. |

---

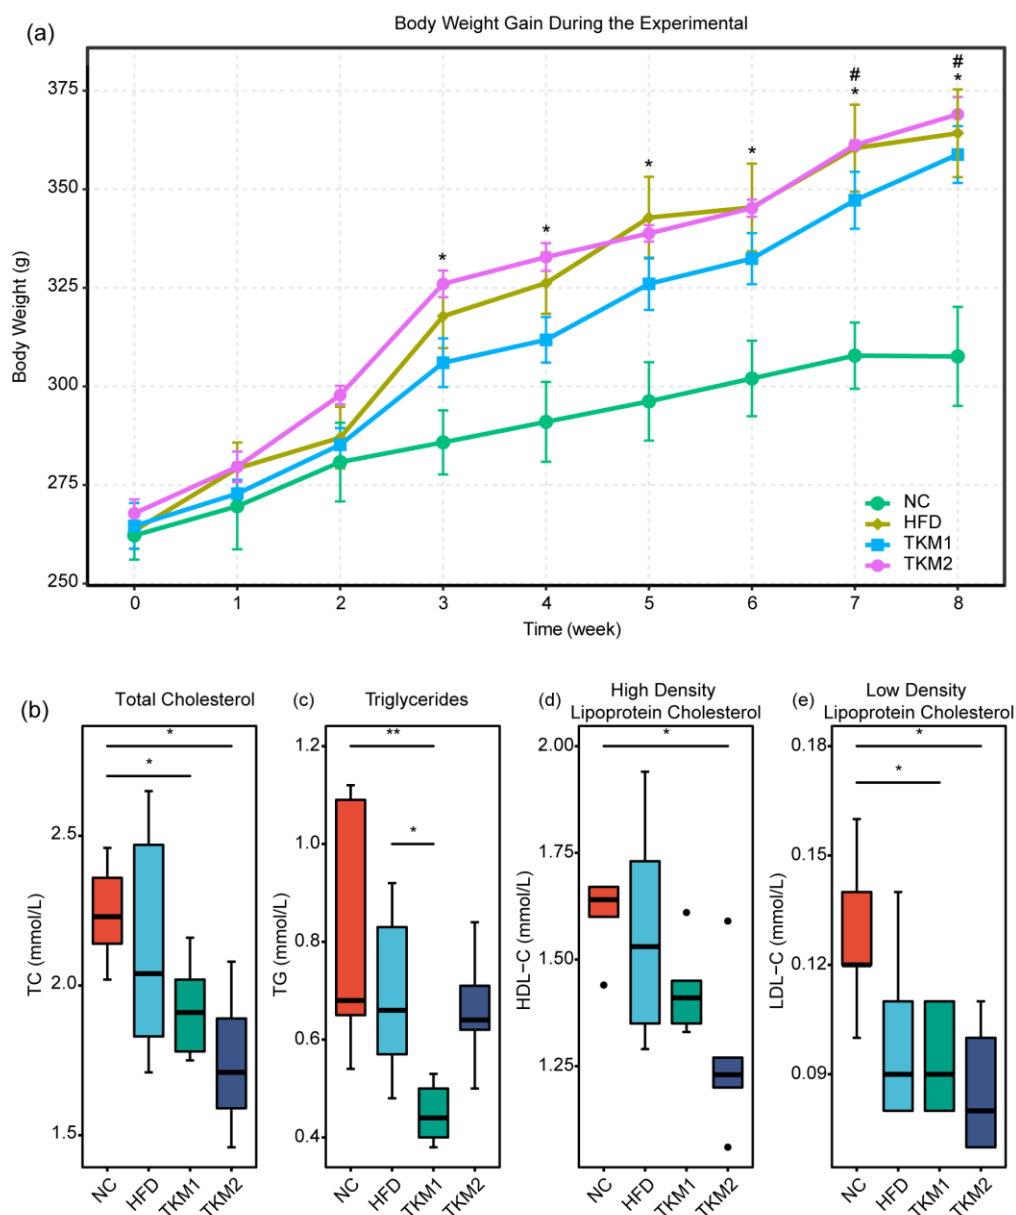

**Figure S1.** Body weight and serum lipid level

(a) The body weight changes during 8 weeks (mean  $\pm$  SD), \* indicates a statistically significant difference ( $p < 0.05$ ) between HFD and NC group; # indicates a statistically significant difference ( $p < 0.05$ ) between TKM1 and NC group; (b) Total Cholesterol, mmol/L; (c) Triglyceride, mmol/L; (d) High Density Lipoprotein Cholesterol, mmol/L; (e) Low Density Lipoprotein Cholesterol, mmol/L; \* $p < 0.05$ ; \*\* $p < 0.01$ , analysis in *Wilcoxon* test.  $n = 5$  for each group.

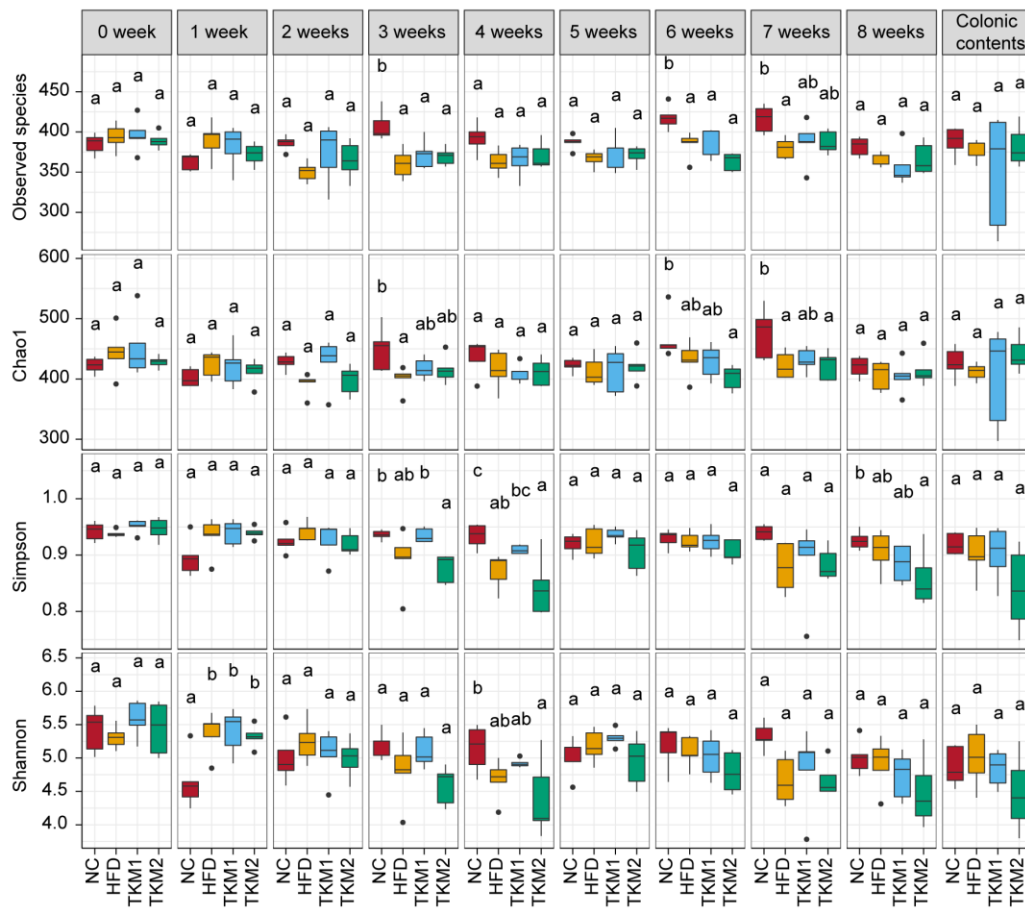

**Figure S2.** The richness and diversity of gut microbiota

16s rRNA Gene Sequencing of 199 samples (179 fecal samples and 20 colonic contents samples) from 20 HMA-rats were performed. Observed species and Chao1 indices reflect the richness of species, while Shannon and Simpson indexes represent microbial  $\alpha$ -diversity.

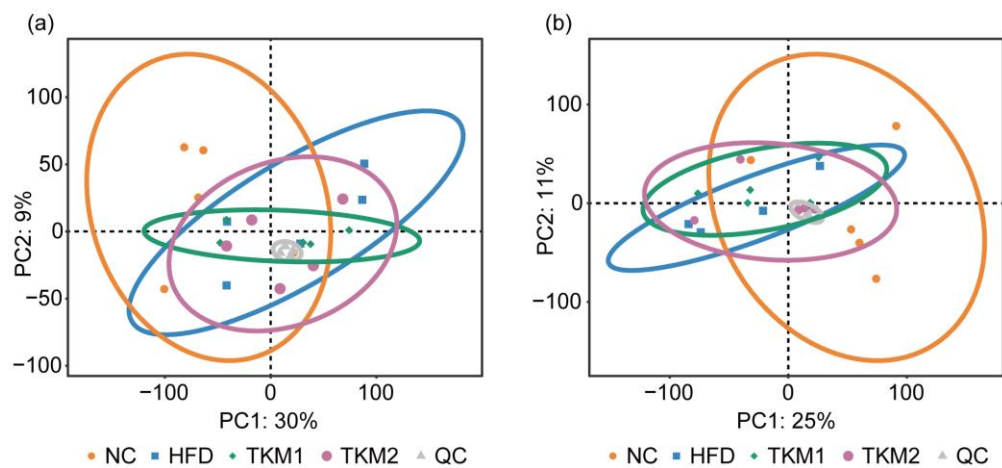

**Figure S3.** Differential metabolites analysis by PCA

(a) PCA score plot from positive ion mode; (b) PCA score plot from negative ion mode.
